# Supplementary material for: TDP-43 maximizes nerve conduction velocity by repressing a cryptic exon for paranodal junction assembly in Schwann cells
Source: eLife. 2021 Mar 10;10:e64456. doi: 10.7554/eLife.64456 (PMC7946431; doi:10.7554/eLife.64456)
Supplement: Figure 1—source data 1. [file elife-64456-fig1-data1.xlsx]

## Sheet: 1C
Individual values:						One-way ANOVA:
	WT	cHet	cKO				DF	Sum of Squares	Mean Square	F Value	Prob>F
	22.8	22.2	10.5			Model	2	319.088	159.544	15.597	0.00174
	21.3	22.7	10			Error	8	81.8333	10.2292
	20.1	26.4	12			Total	10	400.922
	29.1
	18.2					Tukey's test:
							MeanDiff	SEM	q Value	p Value
n (mice)	5	3	3			cHet WT	1.46667	2.33571	0.88803	0.80938
Mean	22.3	23.7667	10.8333			cKO WT	-11.4667	2.33571	6.94277	0.00299
SEM	1.8593	1.32455	0.60093			cKO cHet	-12.9333	2.61141	7.00408	0.00283
						Levene's test (squared deviations):
							DF	Sum of Squares	Mean Square	F Value	Prob>F
						Model	2	385.779	192.89	1.02303	0.40214
						Error	8	1508.38	188.548

## Sheet: 1E P3
Individual values:						One-way ANOVA:
	WT	cHet	cKO				DF	Sum of Squares	Mean Square	F Value	Prob>F
	35.2145	34.6451	25.4209			Model	2	256.659	128.329	6.79907	0.0287
	38.1031	45.3433	27.6609			Error	6	113.247	18.8745
	42.7163	34.0676	28.0216			Total	8	369.906
n (mice)	3	3	3			Tukey's test:
Mean	38.6779	38.0187	27.0345				MeanDiff	SEM	q Value	p Value
SEM	2.18458	3.66611	0.81348			cHet WT	-0.65925	3.54726	0.26283	0.9812
						cKO WT	-11.6435	3.54726	4.642	0.03851
						cKO cHet	-10.9842	3.54726	4.37917	0.04829
						Levene's test (squared deviations):
							DF	Sum of Squares	Mean Square	F Value	Prob>F
						Model	2	1021.3	510.651	2.50493	0.16185
						Error	6	1223.15	203.858

## Sheet: 1E P21
Individual values:						One-way ANOVA:
	WT	cHet	cKO				DF	Sum of Squares	Mean Square	F Value	Prob>F
	45.946	45.287	41.9027			Model	2	38.8515	19.4258	0.68836	0.5381
	46.0068	57.4699	48.3637			Error	6	169.322	28.2203
	54.3145	45.0861	43.6369			Total	8	208.173
n (mice)	3	3	3			Tukey's test:
Mean	48.7557	49.281	44.6345				MeanDiff	SEM	q Value	p Value
SEM	2.77941	4.09485	1.93066			cHet WT	0.52525	4.33746	0.17126	0.99196
						cKO WT	-4.1213	4.33746	1.34374	0.63153
						cKO cHet	-4.64655	4.33746	1.51499	0.56398
						Levene's test (squared deviations):
							DF	Sum of Squares	Mean Square	F Value	Prob>F
						Model	2	1071.2	535.601	1.50989	0.29435
						Error	6	2128.37	354.729

## Sheet: S2A-1
Individual values:						Two-sample two-tailed t-test (equal variance not assumed):
	WT	cKO					t Statistic	DF	p Value
	0.68045	0.66409				WT vs cKO	2.54471	2.07621	0.12138
	0.6697	0.66231
	0.69254	0.66546
						Two-sample test for variance:
n (mice)	3	3					F	Numer. DF	Denom. DF	Prob > F
Mean	0.6809	0.66396				WT vs cKO	52.4654	2	2	0.03741
SEM	0.0066	0.000910711

## Sheet: S2A-2
WT		cKO
Axon diameter	g-ratio	Axon diameter	g-ratio
3.3551	0.66476	2.37094	0.62476
3.99819	0.70289	1.47468	0.67378
3.4009	0.74111	1.99024	0.77194
4.0419	0.70912	3.40875	0.69955
1.49951	0.62492	2.36879	0.68924
3.21717	0.6908	1.20742	0.70965
1.97095	0.76071	1.60928	0.71041
1.28159	0.75852	2.45017	0.63605
2.59429	0.63426	2.36691	0.62934
1.81455	0.64608	2.36637	0.70969
1.86029	0.69718	2.88587	0.67873
2.21059	0.70703	2.22408	0.6793
3.2946	0.72623	2.38939	0.71466
2.78689	0.70148	1.42238	0.73456
3.09493	0.75212	2.55871	0.69291
2.52994	0.67828	1.76439	0.75582
3.77257	0.66717	0.97001	0.639
3.44183	0.71027	2.38005	0.5822
2.41774	0.5932	1.86371	0.69497
2.94526	0.66048	2.18364	0.56635
3.11114	0.62109	1.63401	0.74004
1.91559	0.69719	3.06329	0.57545
1.456	0.71866	2.03609	0.51441
2.30394	0.66435	1.28358	0.6458
1.97805	0.64726	1.45031	0.79937
2.79146	0.64745	1.86609	0.67659
1.79905	0.59276	2.48628	0.6741
2.13141	0.60943	2.55622	0.68564
1.98511	0.70068	2.52515	0.62703
1.69895	0.6522	2.61141	0.59521
2.57483	0.63003	3.01765	0.60165
2.47087	0.5799	3.29691	0.65637
4.02121	0.71562	1.62894	0.55959
2.5879	0.63306	1.60293	0.79238
1.86541	0.74694	1.4125	0.70256
1.68011	0.63542	1.55986	0.73862
1.47813	0.7317	2.30808	0.66323
2.48653	0.75475	2.24488	0.68215
1.87528	0.63975	1.59217	0.65517
1.93114	0.74299	3.26957	0.68264
1.2661	0.69486	2.94656	0.69322
2.16225	0.6669	0.80582	0.60596
2.25478	0.66419	1.43619	0.74176
1.90191	0.60189	2.11251	0.7126
1.85583	0.59106	2.55198	0.72418
4.91966	0.69628	2.28813	0.65149
2.2576	0.68255	4.17409	0.67892
1.36062	0.74407	2.34285	0.64491
1.8431	0.69575	2.20799	0.67772
2.43322	0.73043	3.2007	0.63472
1.64333	0.68606	2.43871	0.59587
4.07937	0.67346	2.18859	0.57284
4.81052	0.7141	2.20366	0.62504
2.81485	0.65847	2.07787	0.6813
2.38005	0.68391	1.81946	0.59704
2.53094	0.56558	1.6472	0.56157
3.17052	0.61773	1.7499	0.6188
3.45457	0.72323	1.37598	0.57285
1.98896	0.64556	1.73418	0.59754
3.12767	0.67324	4.30932	0.72119
1.59297	0.73444	1.75317	0.69154
1.38382	0.72993	1.78911	0.50382
1.53849	0.74957	2.44861	0.57016
2.70787	0.67631	1.56841	0.59042
1.97353	0.63102	2.07542	0.56591
3.21934	0.70641	2.05879	0.71121
2.83939	0.67679	3.28763	0.59714
2.2545	0.67248	2.4595	0.64495
2.00236	0.6573	2.29314	0.62737
3.10663	0.72036	2.04763	0.66146
2.82298	0.70346	1.55454	0.54535
1.79409	0.75253	2.06034	0.71382
2.05786	0.74672	1.61244	0.7368
3.05184	0.61905	2.26801	0.60096
3.45881	0.68889	2.43165	0.72812
2.23123	0.61752	1.64488	0.74805
2.14867	0.6337	1.86029	0.77438
1.3564	0.71981	2.60287	0.76535
1.55495	0.69762	2.55348	0.55955
3.16248	0.69133	2.49854	0.65569
3.15099	0.65333	2.19266	0.67246
2.84991	0.67503	2.03859	0.67223
1.86882	0.63076	1.99503	0.7067
2.20251	0.60006	3.30944	0.63309
1.65414	0.6436	1.84482	0.59227
2.52111	0.70756	1.6379	0.61072
2.31139	0.6697	1.55168	0.64608
3.70789	0.71999	1.97547	0.79609
1.73528	0.70503	1.61244	0.64745
2.3696	0.69133	2.18043	0.58262
1.99949	0.71577	1.70643	0.76575
1.62972	0.66095	1.84551	0.74491
2.1537	0.66643	1.25296	0.66755
1.26207	0.6807	2.51555	0.63789
5.00916	0.73157	2.70552	0.63132
3.82236	0.70649	2.62794	0.69523
1.44987	0.68459	3.61575	0.68901
2.21174	0.6587	1.89856	0.71683
2.42037	0.67601	4.06217	0.7233
3.04495	0.7269	3.33264	0.62331
2.43557	0.68539	2.91375	0.61397
3.95674	0.72939	3.03763	0.72642
2.60189	0.69423	1.77697	0.76233
1.32986	0.67855	4.17729	0.6678
1.47856	0.70997	2.32183	0.57588
3.33607	0.70738	1.89218	0.63027
1.59017	0.75286	3.12339	0.68625
2.67095	0.65836	2.50693	0.6244
1.36762	0.69225	2.79783	0.66052
3.6548	0.68844	3.19672	0.73206
3.05247	0.72018	2.49063	0.64985
2.37684	0.71964	2.29119	0.61704
2.13619	0.7045	1.64527	0.7522
1.6499	0.69737	1.58416	0.70029
1.01303	0.65994	2.35396	0.60984
2.97623	0.76427	1.71164	0.56053
3.31175	0.70049	2.55099	0.62879
3.21043	0.62723	2.50566	0.71069
2.33004	0.70778	4.07671	0.70596
1.6839	0.70696	4.17881	0.69847
3.26938	0.64902	1.62031	0.75705
3.89135	0.66209	1.256	0.66951
2.97665	0.56995	1.23865	0.72578
3.31885	0.6136	1.63945	0.83926
1.60967	0.66912	1.97708	0.6497
2.09283	0.64063	1.61599	0.73722
4.32848	0.65183	2.14422	0.7268
4.13162	0.68386	1.71499	0.66139
2.98349	0.60646	1.38059	0.65166
2.72522	0.67974	2.08796	0.53593
1.48072	0.66023	1.86473	0.67939
4.58752	0.68333	1.7109	0.66965
1.46602	0.60729	1.35264	0.69989
4.54122	0.67285	1.3564	0.72597
1.11533	0.55897	2.27362	0.74554
3.07512	0.63705	2.21892	0.57621
1.4179	0.66137	2.01851	0.62794
4.49288	0.6721	1.66603	0.73135
3.66315	0.65658	1.6073	0.77599
3.1526	0.57481	2.40797	0.71032
3.5518	0.6669	1.30424	0.69292
2.11402	0.65006	1.53352	0.71542
4.53547	0.69825	2.35126	0.63151
3.66159	0.69803	1.4161	0.76212
2.41405	0.59753	1.8431	0.63619
2.04015	0.66021	2.00013	0.57838
3.5286	0.68349	1.64101	0.73886
3.20845	0.68933	2.59748	0.59802
3.08256	0.63005	2.67333	0.69922
3.53419	0.6275	1.18668	0.68647
3.61346	0.64417	1.47641	0.76324
1.52059	0.70184	3.15099	0.69543
1.47079	0.65462	1.6967	0.65391
1.17914	0.63424	2.71375	0.59411
3.09575	0.68162	2.72381	0.63436
3.05476	0.63236	1.9086	0.66767
1.71276	0.70462	1.71053	0.7346
2.40029	0.72379	1.5231	0.64182
1.95897	0.63295	2.01693	0.53628
1.39482	0.72165	1.16393	0.70289
1.73014	0.65334	2.50465	0.67101
2.23892	0.69168	2.12753	0.53168
1.65991	0.60318	2.04949	0.59518
2.43793	0.61041	2.6614	0.67938
3.06807	0.63024	1.85515	0.71266
2.90478	0.70835	1.98768	0.73736
2.69089	0.55018	1.83444	0.67087
2.43244	0.6531	1.17968	0.76223
2.10073	0.7129	2.17605	0.6602
1.9318	0.62725	1.87155	0.60852
2.22894	0.61796	1.40346	0.50676
2.32621	0.6981	2.11131	0.58921
2.24091	0.68094	2.29896	0.6685
1.62815	0.68405	2.46803	0.70717
1.23092	0.72029	1.41745	0.51629
1.8247	0.82764	2.0364	0.61256
2.26801	0.68231	1.93575	0.48542
2.51479	0.56834	1.75788	0.53596
3.06766	0.6716	3.08359	0.62859
1.73271	0.59941	3.30598	0.62283
3.2001	0.65682	2.6175	0.58096
2.60507	0.57723	1.79551	0.61374
3.09369	0.58199	2.3591	0.51745
1.64372	0.73984	2.00839	0.68677
2.69042	0.66654	2.06712	0.59621
1.58295	0.57251	2.08369	0.70737
2.80306	0.71965	3.10048	0.65404
1.30033	0.7255	2.09678	0.71739
1.34178	0.61219	2.09405	0.74414
2.33031	0.66159	1.79089	0.76833
3.00518	0.69481	1.60888	0.64904
2.11673	0.68442	1.08465	0.70311
1.63634	0.64011	1.50079	0.7185
2.71187	0.69466	2.06958	0.64122
1.79231	0.67322	2.55124	0.65262
2.61385	0.64193	2.58002	0.59972
2.26801	0.64911	2.62479	0.5306
4.51239	0.71849	1.65684	0.63025
2.75172	0.64599	3.52246	0.6383
3.28259	0.72294	2.90303	0.64183
2.49088	0.69367	2.29453	0.68852
1.61599	0.76298	3.6727	0.74245
1.59537	0.72472	2.3056	0.67621
2.31771	0.6544	2.17926	0.63401
3.13864	0.58593	1.53559	0.69623
2.60017	0.60863	2.79487	0.67658
2.57878	0.65372	2.52565	0.63785
4.29941	0.70351	2.71984	0.69707
2.31194	0.70359	2.05353	0.68737
2.38886	0.69996	1.89386	0.79179
1.7827	0.686	2.40241	0.75113
2.2753	0.71566	2.07573	0.61092
2.45069	0.71853	2.63544	0.59633
1.47684	0.75471	2.0791	0.51246
1.39664	0.7596	1.66909	0.73171
1.61086	0.65834	1.93345	0.74322
2.22951	0.6452	1.70941	0.65459
2.23607	0.59374	2.86795	0.65569
3.53311	0.6472	1.76042	0.76659
1.97579	0.62847	1.78341	0.60385
1.40573	0.73763	2.07358	0.66899
1.85171	0.59546	1.47209	0.63614
1.67099	0.72181	2.0049	0.65801
2.09678	0.70723	1.1672	0.66273
3.76074	0.666	1.22625	0.69902
2.65565	0.67511	2.75773	0.6636
2.90412	0.69078	3.25142	0.75766
1.58054	0.72021	1.21583	0.63133
1.82435	0.74942	2.09496	0.67169
2.14422	0.7039	1.26459	0.65435
2.27446	0.68622	2.30366	0.60248
2.76027	0.68625	1.38795	0.60823
1.68956	0.69772	1.28358	0.66452
2.65085	0.54334	2.41721	0.62376
2.42929	0.65071	1.20584	0.61402
1.97708	0.69054	1.18184	0.64942
3.31981	0.68651	1.50967	0.65476
1.99535	0.57315	2.18597	0.65214
1.94461	0.71007	1.9209	0.64354
2.68094	0.72361	1.22001	0.81225
2.66809	0.71223	1.20054	0.64045
1.83756	0.70796	2.15192	0.69018
3.4874	0.67988	1.1579	0.70608
1.98223	0.7255	1.47209	0.57637
2.06743	0.70191	1.90325	0.58324
1.57852	0.65268	1.34746	0.8189
1.66182	0.70661	2.07757	0.71258
1.66985	0.74155	1.7499	0.77228
1.82609	0.72175	2.098	0.66267
2.21864	0.6018	1.82888	0.56641
1.70456	0.7083	2.96551	0.69752
2.1341	0.58339	1.27212	0.68316
3.63261	0.65587	1.55291	0.75792
3.38683	0.62896	1.86063	0.77571
2.62284	0.61298	1.90057	0.73422
2.97644	0.71302	2.03672	0.73936
1.6576	0.69367	1.46472	0.66921
2.3564	0.61583	2.11733	0.75207
2.47961	0.65989	2.68592	0.65865
3.20785	0.67337	2.52212	0.64867
1.68843	0.74105	3.00708	0.65699
1.72977	0.73178	2.61117	0.66796
1.22573	0.70781	1.51388	0.6481
1.34935	0.64893	2.06404	0.71173
2.31689	0.62807	3.01786	0.63111
2.67047	0.55514	1.21268	0.59309
3.66089	0.66794	2.72124	0.6383
1.6645	0.68315	3.0246	0.67898
3.7356	0.60158	2.5736	0.63395
3.71852	0.63494	2.65517	0.71933
4.2874	0.68277	3.63033	0.73872
2.02575	0.74924	2.87836	0.62405
2.32977	0.61769	3.47167	0.63939
1.67213	0.72571	2.75426	0.64955
1.44018	0.65457	2.52641	0.65751
2.26801	0.64949	1.58054	0.7048
2.86728	0.58263	2.79168	0.6563
1.74151	0.66129	1.69069	0.55822
3.41062	0.63838	1.57246	0.7205
3.01026	0.72777	1.47339	0.70993
2.67333	0.72109	2.11372	0.65527
1.70419	0.6544	1.55904	0.65095
1.66527	0.74168	2.69657	0.68885
2.63084	0.63534	2.12543	0.63953
2.60409	0.72779	1.53019	0.72446
1.16447	0.69294	1.58777	0.72708
1.49014	0.77044	1.27612	0.64447
2.82861	0.76685	1.55863	0.66251
2.95109	0.71298	1.99726	0.69415
4.07093	0.71034	1.88848	0.66578
3.53599	0.74286	1.10039	0.65097
2.28256	0.7653	2.53446	0.70081
2.94764	0.73113	1.63284	0.7399
2.70152	0.73943	2.17165	0.77958
1.72904	0.72862	3.30829	0.69498
2.58101	0.77345	3.47222	0.66135
1.35217	0.763	1.95115	0.59321
1.62424	0.80081	2.76464	0.61482
1.28259	0.74804	1.84241	0.70796
2.27026	0.7404	2.02543	0.60798
3.60587	0.69319	2.63374	0.58635
3.13681	0.66672	1.95539	0.66208
2.28368	0.78324	2.83894	0.69159
2.55821	0.77282	2.62309	0.63496
3.41286	0.67171	1.6982	0.74804
3.02944	0.73008	2.50058	0.73534
3.01174	0.67775	1.88544	0.74305
2.66068	0.5997	1.43086	0.80527
1.78982	0.67443	3.33073	0.71556
4.27773	0.6468	2.89732	0.678
3.41435	0.62599	2.6935	0.66449
5.10097	0.75671	2.34909	0.61735
3.9548	0.71713	2.8153	0.67883
5.01843	0.75009	1.75933	0.75335
4.24607	0.74205	3.30579	0.67634
4.07906	0.72182	2.06311	0.70147
2.95799	0.71901	2.62576	0.66919
2.84477	0.76787	2.49242	0.71122
2.94159	0.73364	2.41615	0.63547
2.30034	0.74775	2.24318	0.67178
3.53022	0.75204	1.36015	0.55287
1.53559	0.62534	2.01819	0.5672
1.27861	0.73038	2.29397	0.54103
2.46183	0.70705	2.09009	0.53951
2.18218	0.75924	1.66794	0.5104
2.55921	0.71263	2.0526	0.76175
2.93639	0.7058	3.1518	0.62266
2.38085	0.66937	1.64875	0.47614
1.61796	0.75116	2.34909	0.57958
2.99478	0.70386	1.46472	0.63664
3.46102	0.66088	1.313	0.70553
2.23408	0.70652	3.19931	0.65975
2.07818	0.74589	2.80941	0.58831
1.49526	0.70423	1.66756	0.78305
3.28976	0.68227	2.23008	0.7953
2.22036	0.70524	1.74771	0.5631
1.53227	0.69767	2.74198	0.65945
1.83062	0.69589	1.90459	0.73463
2.55722	0.67416	2.56815	0.68848
2.35612	0.67315	1.74735	0.71808
1.38566	0.70781	1.97869	0.7448
1.7741	0.72528	1.60174	0.75138
3.136	0.75603	2.17985	0.68423
3.07532	0.64346	1.76907	0.71649
2.34094	0.71875	1.4273	0.66039
2.54123	0.67492	1.95961	0.62695
2.16107	0.72983	2.21404	0.69015
2.30477	0.69488	1.15404	0.74548
3.51649	0.63286	1.24889	0.7611
2.13619	0.58943	2.30615	0.61234
2.55921	0.61828	1.64643	0.59343
2.31249	0.66062	2.97516	0.60212
2.73803	0.67873	2.00204	0.57695
5.3557	0.70883	1.6073	0.6744
1.82505	0.65624	3.06973	0.69298
3.31905	0.6071	2.0163	0.6102
3.03616	0.69064	1.98736	0.66348
1.98928	0.66636	1.67822	0.65346
2.88212	0.55191	2.04514	0.57236
2.14214	0.73307	2.42483	0.72669
2.94505	0.65256	2.09222	0.58866
1.37829	0.75469	1.67822	0.58307
1.83617	0.69759	2.25986	0.65544
2.2077	0.77093	2.4306	0.65293
2.10617	0.70815	1.72904	0.67566
2.13619	0.68463	2.72054	0.62793
1.70978	0.7107	1.38336	0.61555
2.45562	0.70168	2.48448	0.64895
3.28279	0.63783	2.10708	0.59236
2.98967	0.63968	2.03046	0.69146
3.32441	0.61286	3.09534	0.65644
1.29837	0.54226	1.81946	0.56655
2.62503	0.6426	2.03703	0.68888
1.22988	0.61807	1.97482	0.71272
2.57112	0.64421	1.87018	0.63825
3.81986	0.71374	1.47166	0.57093
2.73617	0.64167
1.77841	0.59391
2.25676	0.73158
1.86644	0.67176
2.12423	0.67218
3.00157	0.60594
2.40003	0.61602
2.98456	0.70051
3.72946	0.70668
1.07047	0.62583
3.12868	0.67652
1.88814	0.71301
2.27474	0.6328
2.32676	0.59618
3.80918	0.64029
2.11823	0.72786
1.69482	0.78362
2.08796	0.75108
2.96229	0.70559
3.05705	0.67738
1.8334	0.72829
2.96573	0.6933
2.86084	0.69626
2.38406	0.65423
2.90763	0.72989
2.12902	0.73694
2.13261	0.65647
2.02229	0.68825
3.62559	0.67521
2.32457	0.64777
3.60446	0.70119
2.01851	0.63029
3.02102	0.73665
2.94159	0.68961
2.89358	0.65799
1.80823	0.67566
2.78689	0.64409
2.6645	0.68033
2.28033	0.69094

## Sheet: S2B
Axon diameter	% in WT	% in cKO
0.25	0	0
0.5	0	0
0.75	0	0
1	0	0.53191
1.25	1.92771	4.78723
1.5	7.95181	9.04255
1.75	11.3253	16.4894
2	10.3614	13.5638
2.25	10.6024	17.5532
2.5	13.0121	11.4362
2.75	9.63855	11.4362
3	8.6747	4.78723
3.25	8.91566	4.25532
3.5	5.3012	3.45745
3.75	4.81928	1.06383
4	2.16867	0
4.25	1.68675	1.32979
4.5	1.20482	0.26596
4.75	0.96386	0
5	0.48193	0
5.25	0.72289	0
5.5	0.24096	0
5.75	0	0
6	0	0
