# Supplementary material for: TDP-43 maximizes nerve conduction velocity by repressing a cryptic exon for paranodal junction assembly in Schwann cells
Source: eLife. 2021 Mar 10;10:e64456. doi: 10.7554/eLife.64456 (PMC7946431; doi:10.7554/eLife.64456)
Supplement: Figure 2—source data 1. [file elife-64456-fig2-data1.xlsx]

## Sheet: 2H 24 rpm
Individual values:						Mann-Whitney test:
	WT	cKO					U	Z	p Value
	90	90				WT vs cKO	82.5	2.45239	0.0115
	90	74.6667
	81	81.6667
	71.6667	84.6667
	75	40.3333
	88.6667	71
	90	37
	90	53.3333
	75.3333	40.3333
	90	72.3333
n (mice)	10	10
Minimum	71.6667	37
Q1	75.25	40.3333
Median	89.3333	71.6667
Q3	90	82.4167
Maximum	90	90
Before the outlier (framed) was removed:
	WT	cKO				Mann-Whitney test:
	90	90					U	Z	p Value
	90	74.6667				WT vs cKO	82.5	1.9239	0.05081
	81	81.6667
	71.6667	84.6667
	75	40.3333				Interquartile range method to determine outliers:
	88.6667	71				Q3	90
	90	37				Q1	75
	90	53.3333				IQR	15
	75.3333	40.3333				Lower outlier fence	52.5	> 33.3
	90	72.3333
	33.3333
n (mice)	11	10
Minimum	33.3333	37
Q1	75	40.3333
Median	88.6667	71.6667
Q3	90	82.4167
Maximum	90	90

## Sheet: 2H 32 rpm
Individual values:						Mann-Whitney test:
	WT	cKO					U	Z	p Value
	90	67.3333				WT vs cKO	87	2.77062	0.00359
	76.3333	73
	90	80.6667
	52.6667	55
	45.6667	34
	90	29
	76	26.6667
	74	41.3333
	84	29
	90	63.6667
n (mice)	10	10
Minimum	45.6667	26.6667
Q1	68.6667	29
Median	80.1667	48.1667
Q3	90	68.75
Maximum	90	80.6667
Before the outlier (framed) was removed:
	WT	cKO				Mann-Whitney test:
	90	67.3333					U	Z	p Value
	76.3333	73				WT vs cKO	90	2.43814	0.01176
	90	80.6667
	52.6667	55
	45.6667	34
	90	29
	76	26.6667
	74	41.3333
	84	29
	90	63.6667
	32
n (mice)	11	10
Minimum	32	26.6667
Q1	52.6667	29
Median	76.3333	48.1667
Q3	90	68.75
Maximum	90	80.6667
