# Supplementary material for: TDP-43 maximizes nerve conduction velocity by repressing a cryptic exon for paranodal junction assembly in Schwann cells
Source: eLife. 2021 Mar 10;10:e64456. doi: 10.7554/eLife.64456 (PMC7946431; doi:10.7554/eLife.64456)
Supplement: Figure 5—source data 1. [file elife-64456-fig5-data1.xlsx]

## Sheet: Tardbp ex3
Individual values:						One-sample two-tailed t-test:
	WT	cHet	cKO				t Statistic	DF	p Value
	1	0.74409	0.42407			cHet	-4.75265	2	0.04153
	1	0.83203	0.3702			cKO	-37.5851	2	0.000707143
	1	0.8749	0.38398
n (mice)	3	3	3
Mean	1	0.81701	0.39275
SEM	0	0.0385	0.01616

## Sheet: Tardbp ex4-5
Individual values:						One-sample two-tailed t-test:
	WT	cHet	cKO				t Statistic	DF	p Value
	1	0.81571	0.47279			cHet	-1.98321	2	0.18581
	1	0.95774	0.43265			cKO	-45.8374	2	0.00047561
	1	0.95117	0.46062
n (mice)	3	3	3
Mean	1	0.90821	0.45535
SEM	0	0.04629	0.01188

## Sheet: pan Nfasc
Individual values:						One-sample two-tailed t-test:
	WT	cHet	cKO				t Statistic	DF	p Value
	1	1.03842	0.14844			cHet	-0.82418	2	0.49649
	1	0.89788	0.10833			cKO	-30.4359	2	0.00108
	1	0.96331	0.20423
n (mice)	3	3	3
Mean	1	0.96654	0.15367
SEM	0	0.0406	0.02781

## Sheet: NF155
Individual values:						One-sample two-tailed t-test:
	WT	cHet	cKO				t Statistic	DF	p Value
	1	1.00422	0.21185			cHet	-1.68228	2	0.23454
	1	0.86281	0.15304			cKO	-24.8038	2	0.00162
	1	0.92664	0.26338
n (mice)	3	3	3
Mean	1	0.93122	0.20942
SEM	0	0.04088	0.03187

## Sheet: NF140+ex27
Individual values:						One-sample two-tailed t-test:
	WT	cHet	cKO				t Statistic	DF	p Value
	1	1.08588	1.21781			cHet	2.40261	2	0.13821
	1	1.07671	1.13073			cKO	3.52733	2	0.07182
	1	1.25488	1.07928
n (mice)	3	3	3
Mean	1	1.13916	1.14261
SEM	0	0.05792	0.04043

## Sheet: NF140-ex27
Individual values:						One-sample two-tailed t-test:
	WT	cHet	cKO				t Statistic	DF	p Value
	1	1.07533	0.2825			cHet	0.59523	2	0.61207
	1	0.92977	0.18659			cKO	-22.1438	2	0.00203
	1	1.08435	0.29219
n (mice)	3	3	3
Mean	1	1.02982	0.25376
SEM	0	0.05009	0.0337
